# Supplementary material
Source: PubMed Central journal article supplement (PMC11407588)
Supplement: Appendix_2_Health_Administrative_Data_Sets.pdf [file Appendix_2_Health_Administrative_Data_Sets.pdf]

## Appendix 2

### Description of health administrative data sets

| Data set                                                          | Description                                                                                                                                                                                                                                                  | Relevant variables                                                                                                                                                                                                                                                                                                                                                                                                                                                                                                                                                                                                                                                      |
|-------------------------------------------------------------------|--------------------------------------------------------------------------------------------------------------------------------------------------------------------------------------------------------------------------------------------------------------|-------------------------------------------------------------------------------------------------------------------------------------------------------------------------------------------------------------------------------------------------------------------------------------------------------------------------------------------------------------------------------------------------------------------------------------------------------------------------------------------------------------------------------------------------------------------------------------------------------------------------------------------------------------------------|
| Ontario Health Insurance Plan (OHIP)                              | The OHIP claims database contains information on publicly funded health services, primarily provided by physicians, to Ontario residents eligible for provincial health insurance. The main data elements are service/billing codes submitted by physicians. | <ul style="list-style-type: none"> <li><input type="checkbox"/> <b>Cohort creation:</b> physicians who submitted at least one OHIP fee claim in 2019 with “00” specialty code</li> <li><input type="checkbox"/> <b>Cohort classification:</b> FP-COE fee codes (i.e., A967, K703, K077, B988, B986)</li> <li><input type="checkbox"/> <b>Primary outcome:</b> family physicians with evidence of a FP-COE</li> <li><input type="checkbox"/> <b>Baseline characteristics:</b> Various fee codes (e.g., K132, K070, K038, A900), number of referrals to geriatric medicine and psychiatry, nursing home practice<sup>1</sup>, gross payments for OHIP billings</li> </ul> |
| ICES Physician Database (IPDB)                                    | IPDB uses billing and workforce information to assign specialties based on the proportion of specialty billing codes used.                                                                                                                                   | <ul style="list-style-type: none"> <li><input type="checkbox"/> <b>Baseline characteristics:</b> physician sex, birth year, graduation year, location of medical school, size of CMA, practice type, focused practice,<sup>2</sup> main LHIN of practice, rurality, affiliation with PEM, consultation count, visit count, percent of FFS billings, core primary care billings</li> </ul>                                                                                                                                                                                                                                                                               |
| Primary Care Population (PCPOP)                                   | PCPOP is an ICES-derived cohort of Ontario residents who are eligible for provincial health insurance and had at least one health services encounter within nine years of the index event.                                                                   | <ul style="list-style-type: none"> <li><input type="checkbox"/> <b>Baseline characteristics:</b> physician model of care for most patients, median age of patients, number of rostered and not rostered patients with a health services encounter (practice size)</li> </ul>                                                                                                                                                                                                                                                                                                                                                                                            |
| Ontario Marginalization Index (ON-MARG)                           | ON-MARG is a geographically based index that quantifies the degree of marginalization using area-level census data.                                                                                                                                          | <ul style="list-style-type: none"> <li><input type="checkbox"/> <b>Baseline characteristics:</b> residential instability factor score, ethnic diversity factor score, material deprivation factor score, economic dependency factor score</li> </ul>                                                                                                                                                                                                                                                                                                                                                                                                                    |
| College of Family Physicians of Canada (CFPC) Membership Database | The CFPC Membership Database is based on an annual survey to clinical and research members. We imported and linked a subset of membership data pertaining to COE CAC holders.                                                                                | <ul style="list-style-type: none"> <li><input type="checkbox"/> <b>Cohort classification:</b> validated list of COE CAC holders</li> <li><input type="checkbox"/> <b>Primary outcome:</b> family physicians with a COE CAC</li> <li><input type="checkbox"/> <b>Baseline characteristics:</b> section of researchers membership, section of teachers membership, type(s) of CAC(s) earned and date(s)</li> </ul>                                                                                                                                                                                                                                                        |

COE=Care of the Elderly; CAC=Certificate of Added Competence; FP-COE=Focused Practice Designation in “Care of the Elderly”; CMA=Census Metro Area; LHIN=Local Health Integration Network; PEM=patient enrolment model; FFS=fee-for-service

**Key References:**

1. Correia RH, Dash D, Poss JW, Moser A, Katz PR, Costa AP. Physician Practice in Ontario Nursing Homes: Defining Physician Commitment. *J Am Med Dir Assoc* [Internet]. 2022 May [cited 2022 Nov 17];S152586102200322X. Available from: <https://linkinghub.elsevier.com/retrieve/pii/S152586102200322X>
2. Schultz SE, Glazier RH. Identification of physicians providing comprehensive primary care in Ontario: a retrospective analysis using linked administrative data. *CMAJ Open* [Internet]. 2017 Dec 19 [cited 2021 May 14];5(4):E856–63. Available from: <http://cmajopen.ca/lookup/doi/10.9778/cmajo.20170083>
