# Supplementary material
Source: PubMed Central journal article supplement (PMC11407588)
Supplement: Appendix_4_Sensitivity_Analysis.pdf [file Appendix_4_Sensitivity_Analysis.pdf]

## Appendix 4

### Sensitivity analysis with increased threshold for focused practice billings

#### Updated Table 1 with revised cohort

**Table 1. Characteristics of family physicians with additional training or focused practice in the care of older adults**

|                                                                                        | CAC-COE and FSP-<br>COE FPs (n=186) | FPs without evidence of<br>additional training or<br>focused practice<br>(n=13,937) |         |
|----------------------------------------------------------------------------------------|-------------------------------------|-------------------------------------------------------------------------------------|---------|
| N (%) <sup>a</sup>                                                                     |                                     |                                                                                     | P value |
| <b>Physician Demographics</b>                                                          |                                     |                                                                                     |         |
| <b>Sex, Female</b>                                                                     | 115 (61.8)                          | 6,784 (48.7)                                                                        | <.001 * |
| <b>Age (years) <sup>a</sup></b>                                                        | 45 (17)                             | 49 (22)                                                                             | 0.001 * |
| <b>Years in practice <sup>a</sup></b>                                                  | 17 (18)                             | 22 (24)                                                                             | <.001 * |
| <b>Rural <sup>b</sup></b>                                                              | 14 (7.5)                            | 1,242 (8.9)                                                                         | 0.51    |
| <b>Community size <sup>c</sup></b>                                                     |                                     |                                                                                     |         |
| ≥1,500,000 residents                                                                   | 70 (37.6)                           | 6,156 (44.2)                                                                        | 0.29    |
| 500,000 to 1,499,999 residents                                                         | 41 (22.0)                           | 2,507 (18.0)                                                                        |         |
| 100,000 to 499,999 residents                                                           | 44 (23.7)                           | 2,818 (20.2)                                                                        |         |
| 10,000 to 99,999 residents                                                             | 17 (9.1)                            | 1,214 (8.7)                                                                         |         |
| <10,000 residents                                                                      | 14 (7.5)                            | 1,242 (8.9)                                                                         |         |
| <b>ED in physician's census subdivision</b>                                            | 150 (80.6)                          | 10,773 (77.3)                                                                       | 0.28    |
| <b>Location of medical school</b>                                                      |                                     |                                                                                     |         |
| Canada                                                                                 | 126 (67.7)                          | 7,657 (54.9)                                                                        | 0.002 * |
| International                                                                          | 19 (10.2)                           | 2,348 (16.8)                                                                        |         |
| Unknown                                                                                | 41 (22.0)                           | 3,932 (28.2)                                                                        |         |
| <b>Community-level marginalization in<br/>primary practice location <sup>a,d</sup></b> |                                     |                                                                                     |         |
| Residential instability                                                                | 0.04 (0.22)                         | 0.02 (0.21)                                                                         | <.001 * |
| Material deprivation                                                                   | -0.12 (0.29)                        | -0.12 (0.43)                                                                        | 0.23    |
| Economic dependency                                                                    | -0.16 (0.55)                        | -0.16 (0.55)                                                                        | 0.40    |
| Ethnic diversity                                                                       | -0.07 (0.93)                        | -0.07 (1.22)                                                                        | 0.005 * |
| <b>Primary Care Practice Model</b>                                                     |                                     |                                                                                     |         |
| <b>Full-time affiliation with a patient<br/>enrolment model</b>                        | 105 (56.5)                          | 9,109 (65.4)                                                                        | 0.01 *  |
| <b>Practice type</b>                                                                   |                                     |                                                                                     |         |
| Comprehensive                                                                          | 102 (54.8)                          | 9,626 (69.1)                                                                        | <.001 * |
| Focused                                                                                | 53 (28.5)                           | 2,177 (15.6)                                                                        |         |
| Other or <44 days in practice                                                          | 31 (16.7)                           | 2,134 (15.3)                                                                        |         |
| <b>Type of patient enrolment model</b>                                                 |                                     |                                                                                     |         |
| <b>Enhanced fee-for-service models</b>                                                 |                                     |                                                                                     |         |
| Comprehensive Care Model<br>or Family Health Group                                     | 11 (5.9)                            | 2,870 (20.6)                                                                        | <.001 * |

|                                                               |                   |                   |         |
|---------------------------------------------------------------|-------------------|-------------------|---------|
| <b>Blended capitation models</b>                              |                   |                   |         |
| Family Health Network or<br>Family Health Organization        | 32 (17.2)         | 2,899 (20.8)      |         |
| <b>Blended salary model</b>                                   |                   |                   |         |
| Family Health Team                                            | 53 (28.5)         | 2,852 (20.5)      |         |
| <b>Other or no enrolment group</b>                            | 80 (43.0)         | 3,964 (28.4)      |         |
| <b>Unknown</b>                                                | 10 (5.4)          | 1,352 (9.7)       |         |
| <b>&gt;50% of payments attributed to fee-for-service</b>      | 82 (44.1)         | 6,992 (50.2)      | 0.01 *  |
| <b>Total OHIP billings (\$) <sup>a</sup></b>                  | 158,358 (145,410) | 159,794 (158,266) | 0.98    |
| <b>Primary Care Activities</b>                                |                   |                   |         |
| <b>Billings attributed to core primary care services</b>      |                   |                   |         |
| Over half of all billings                                     | 119 (64.0)        | 10,265 (73.7)     | 0.01 *  |
| Less than half of all billings                                | 44 (23.7)         | 2,324 (16.7)      |         |
| Unknown                                                       | 23 (12.4)         | 1,348 (9.7)       |         |
| <b>Count of patient visits <sup>a</sup></b>                   | 2,574 (2,380)     | 3,006 (3,013)     | 0.008 * |
| <b>Count of consultations <sup>a</sup></b>                    | 75 (155)          | 2 (31)            | <.001 * |
| <b>Submitted billings for adults aged ≥65</b>                 |                   |                   |         |
| ≥1 Care of the Elderly focused practice assessment (A967)     | 47 (25.3)         | 0 (0.0)           | <.001 * |
| ≥1 geriatric outpatient case conference (K703)                | 55 (29.6)         | 0 (0.0)           | <.001 * |
| ≥1 geriatric telephone support (K077)                         | 20 (10.8)         | 0 (0.0)           | <.001 * |
| ≥1 geriatric home visit premium for first person seen (B988)  | 17 (9.1)          | 0 (0.0)           | <.001 * |
| ≥1 geriatric home visit travel premium (B986)                 | 18 (9.7)          | 0 (0.0)           | <.001 * |
| ≥1 complex house call assessment (A900)                       | 90 (48.4)         | 3,263 (23.4)      | <.001 * |
| ≥1 periodic health visit (K132)                               | 93 (50.0)         | 8,406 (60.3)      | 0.004 * |
| ≥1 home care application (K070)                               | 109 (58.6)        | 5,198 (37.3)      | <.001 * |
| ≥1 completion of long-term care health report form (K038)     | 145 (78.0)        | 7,808 (56.0)      | <.001 * |
| <b>Most responsible physician in long-term care</b>           | 82 (44.1)         | 1,418 (10.2)      | <.001 * |
| <b>Count of specialist referrals made <sup>a</sup></b>        |                   |                   |         |
| <b>Total referrals</b>                                        |                   |                   |         |
| To geriatric medicine                                         | 2 (10)            | 1 (5)             | <.001 * |
| To psychiatry                                                 | 20 (36)           | 28 (45)           | 0.004 * |
| <b>Referrals for patients aged ≥65</b>                        |                   |                   |         |
| To psychiatry                                                 | 6 (11)            | 2 (7)             | <.001 * |
| <b>Primary Care Patients</b>                                  |                   |                   |         |
| <b>Patients with a health services encounter <sup>a</sup></b> | 720 (949)         | 1,273 (1,249)     | <.001 * |
|                                                               | 326 (271)         | 299 (315)         | 0.04 *  |

|                                                     |           |           |         |
|-----------------------------------------------------|-----------|-----------|---------|
| Total (any age)                                     | 195 (697) | 705 (977) | <.001 * |
| Total aged ≥65                                      | 361 (477) | 474 (936) | <.001 * |
| Rostered only (any age)                             |           |           |         |
| Not rostered only (any age)                         |           |           |         |
| <b>Average age of patients, years</b> <sup>a</sup>  |           |           |         |
| Rostered                                            | 57 (29)   | 44 (14)   | <.001 * |
| Not rostered                                        | 61 (31)   | 44 (13)   | <.001 * |
| <b>Patients cared for aged ≥65 (%)</b> <sup>a</sup> | 46 (58)   | 23 (19)   | <.001 * |

FP=Family Physician; ED=Emergency Department; OHIP=Ontario Health Insurance Plan

<sup>a</sup> Median and interquartile range are reported for continuous variables

<sup>b</sup> < 10,000 population in census metropolitan area

<sup>c</sup> Based on Census Metropolitan Area size

<sup>d</sup> Based on Ontario Marginalization Index factor score
